# Supplementary material for: Development of the ecological activity index as an integrative ecosystem assessment and monitoring asset for ocean alkalinity enhancement
Source: Research Square preprint supplement (doi:10.21203/rs.3.rs-6371725/v1), 2025-05-28
Supplement: Supplementary file 1 [file 33216b1731bb067e4506ac77.xlsx]

## Sheet: Species monthly occupancy
Class	Scientific name	Common name	JanFeb	MarApr	MayJun	JulAug	SepOct	NovDec	Relative proportion	Dollars
Zooplankton	Centropages typicus		25651.7	26912.4	16088	29897.7	34646.1	46514	20.4678
Zooplankton	Calanus finmarchicus		3016.16	22778.5	37566.8	20167.3	5843.75	4455.56	10.5295
Zooplankton	Pseudocalanus spp.		7323.55	21857	31113.3	8752.15	2913.46	2916.08	8.5262
Zooplankton	Temora longicornis		1088.39	6652.42	19965.1	9264.73	1142.43	981.426	4.50239
Zooplankton	Centropages hamatus		2219.34	4460.33	10609.9	13500.7	4282.14	3740.9	4.26892
Zooplankton	Paracalanus parvus		4982.42	2058.17	570.513	3175.28	6306.41	7889.59	2.84687
Zooplankton	Acartia spp.		549.363	408.653	1007.55	4960.31	6317.01	4087.5	2.00517
Zooplankton	Metridia lucens		1651.17	3476.71	4407.65	1964.41	1712.49	2431.98	1.78811
Zooplankton	Evadne spp.		92.9055	796.918	6661.7	7631.31	3043.73	296.336	2.0479
Zooplankton	Oithona spp.		1651.07	2654.35	1972.58	2834.21	1529.94	1541.11	1.38208
Zooplankton	Evadne nordmanni		6.67046	63.3042	1144.03	2255.48	189.515	54.6557	0.443056
Zooplankton	Calanus minor		332.834	47.9281	56.1749	627.869	2140.98	1938.89	0.616103
Zooplankton	Clausocalanus arcuicornis		515.425	715.312	465.615	314.723	524.285	988.77	0.401343
Zooplankton	Acartia longiremis		26.3549	119.561	1377.25	750.167	220.364	118.809	0.275867
Zooplankton	Eucalanus spp.		39.8282	13.5248	28.7281	483.055	728.976	284.208	0.184915
Commercial fish larvae	Paralichthys dentatus	Summer Flounder	0.0395836	0.0218579	0.00499411	0.0137221	2.90746	2.7749		26138835
Commercial fish larvae	Melanogrammus aeglefinus	Haddock	0.279129	3.18803	0.870688	0.00754945	0.000290505	0.000309047		17959639
Commercial fish larvae	Centropristis striata	Black Sea Bass	0.00156975	0.0107392	0.0394192	1.15005	0.437619	0.00690152		13693915
Commercial fish larvae	Lophius americanus	Goosefish	0.000234506	0.00974884	0.116961	0.14682	0.0211313	0.00215853		12934322
Commercial fish larvae	Merluccius bilinearis	Silver Hake	0.0108878	0.00116316	0.906179	11.4517	2.64902	0.791857		11339761
Commercial fish larvae	Pollachius virens	Pollock	1.02397	0.192909	0.0190778	0.00189828	0.00353094	0.170384		8644305
Commercial fish larvae	Sebastes spp	Redfish, Acadian	0.00145489	0.0745761	0.351435	0.185212	0.00564832	0.0002498		5816901
Commercial fish larvae	Urophycis spp	Hake	0.0152453	0.00856787	0.201469	18.7581	13.3463	2.43906		5530190
Commercial fish larvae	Clupea harengus	Atlantic Herring	1.59741	0.123044	0.0200798	0.00728487	36.1338	35.6914		3813364
Commercial fish larvae	Glyptocephalus cynoglossus	Witch Flounder	0.000153147	0.0519629	0.281439	0.116234	0.0169402	0.00198559		2855738
Commercial fish larvae	Tautoga onitis	Tautog	0	0.00046669	0.185121	0.166989	0.0018316	0		2845754
Commercial fish larvae	Hippoglossoides platessoides	American Plaice/Sole	0.00163676	0.329943	0.53433	0.0143976	0.000458196	0.000592474		2543611
Commercial fish larvae	Gadus morhua	Atlantic Cod	0.765786	2.01671	0.285516	0.0152967	0.00334554	0.201596		2316909
Commercial fish larvae	Scomber scombrus	Atlantic Mackerel	0	0.00120948	6.964	0.0443437	0.000919934	0		1756063
Commercial fish larvae	Pomatomus saltatrix	Bluefish	0	0	1.49818	3.04314	0.0221894	0		1521149
Commercial fish larvae	Peprilus spp	Butterfish	0.00122039	0.0262647	1.02301	3.52344	0.171982	0.00475741		1502841
Commercial fish larvae	Pseudopleuronectes americanus	Winter Flounder	0.0110409	0.598213	0.961683	0.00158233	0.00117501	0.00017454		1490729
Commercial fish larvae	Leiostomus xanthurus	Spot	0.0591074	0.095155	0.0447953	0.054747	0.0555113	0.00306005		1456906
Commercial fish larvae	Brevoortia tyrannus	Atlantic Manhaden	0.0868294	0.208185	0.204972	0.918983	8.18375	4.0488		620621
Commercial fish larvae	Limanda ferruginea	Yellowtail Flounder	0.000437904	0.222312	6.19071	0.517341	0.00720005	0.00053803		448416
Commercial fish larvae	Cynoscion regalis	Weakfish	0	0	0.0808058	0.423488	0.0622166	0.00531785		314135
Commercial fish larvae	Micropogonias undulatus	Atlantic Croaker	0.0333788	0.00714286	0.0267011	1.55732	16.0285	1.04471		288157
Commercial fish larvae	Menticirrhus spp	Gulf Kingcroaker	0	0	0.05183	0.392635	0.175141	0.000116894		97038
Commercial fish larvae	Tautogolabrus adspersus	Cunner	0	0	1.89434	3.06992	0.0180975	0		8719
Commercial fish larvae	Scophthalmus aquosus	Windowpane Flounder	0.00667624	0.0243997	2.10949	2.10272	2.44565	0.913986		3797
Commercial fish larvae	Prionotus spp	Searobin	0.000122039	0.00888315	0.0591393	8.29707	8.47793	0.0499311		469
Endangered species	Balaenoptera physalus	Fin Whale	0.388396	0.518934	0.898285	0.779923	0.652822	0.39832
Endangered species	Megaptera novaeangliae	Humpback Whale	0.054835	0.176846	0.55381	0.342992	0.414331	0.195385
Endangered species	Eubalaena glacialis	North Atlantic Right Whale	0.0735039	0.108803	0.172818	0.134726	0.0412991	0.0460803
Endangered species	Balaenoptera borealis	Sei Whale	0.0196308	0.0622278	0.198707	0.0777301	0.0445673	0.0186957
Endangered species	Physeter macrocephalus	Sperm Whale	0.0491966	0.0638508	0.0700825	0.110057	0.105625	0.0452737
Endangered species	Chelonia mydas	Green Turtle	0	0.00572908	0.160233	0.286746	0.165211	0.0199271
Endangered species	Lepidochelys kempii	Kemp's Ridley Turtle	0.000164414	0.000603756	0.0101166	0.0122988	0.00884698	0.00295308
Endangered species	Dermochelys coriacea	Leatherback Turtle	0.000298868	0.000259317	0.0125035	0.0721496	0.080225	0.00868526
Endangered species	Caretta caretta	Loggerhead Turtle	0.048641	0.0525098	0.205106	0.175231	0.190528	0.1451
Endangered species	Sterna dougallii	Roseate tern	5.97021e-07	0.000401958	0.00198497	0.00184311	0.001275	0.0010932

## Sheet: Bimonthly species abundance
		January/February															March/April															May/June															July/August
Strata	Region	Chlorophyll a [mg m-3]	Zooplankton [# 100m-3]	C. finmarchicus [# 100m-3]	Fish larvae [# 100m-3]	Commercial fish larvae [# 100m-3]	Fin whale [# 100 km-2]	Humpback whale [# 100 km-2]	North Atlantic Right whale [# 100 km-2]	Sei whale [# 100 km-2]	Sperm whale [# 100 km-2]	Green sea turtle [# 100 km-2]	Kemp's Ridley sea turtle [# 100 km-2]	Leatherback sea turtle [# 100 km-2]	Loggerhead sea turtle [# 100 km-2]	Roseate Tern [# 100 km-2]	Chlorophyll a [mg m-3]	Zooplankton [# 100m-3]	C. finmarchicus [# 100m-3]	Fish larvae [# 100m-3]	Commercial fish larvae [# 100m-3]	Fin whale [# 100 km-2]	Humpback whale [# 100 km-2]	North Atlantic Right whale [# 100 km-2]	Sei whale [# 100 km-2]	Sperm whale [# 100 km-2]	Green sea turtle [# 100 km-2]	Kemp's Ridley sea turtle [# 100 km-2]	Leatherback sea turtle [# 100 km-2]	Loggerhead sea turtle [# 100 km-2]	Roseate Tern [# 100 km-2]	Chlorophyll a [mg m-3]	Zooplankton [# 100m-3]	C. finmarchicus [# 100m-3]	Fish larvae [# 100m-3]	Commercial fish larvae [# 100m-3]	Fin whale [# 100 km-2]	Humpback whale [# 100 km-2]	North Atlantic Right whale [# 100 km-2]	Sei whale [# 100 km-2]	Sperm whale [# 100 km-2]	Green sea turtle [# 100 km-2]	Kemp's Ridley sea turtle [# 100 km-2]	Leatherback sea turtle [# 100 km-2]	Loggerhead sea turtle [# 100 km-2]	Roseate Tern [# 100 km-2]	Chlorophyll a [mg m-3]	Zooplankton [# 100m-3]	C. finmarchicus [# 100m-3]
1	MAB	0.875772	14582.4	143.34	44.7169	32.4054	0.977865	0.0494361	0.053684	0.0777411	0.139301	0	0.00161884	0.00131019	0.596559	2.43711e-06	1.10467	66540.5	4652.8	9.41796	4.75259	1.2138	0.543608	0.0387549	0.12537	0.178313	0.0639993	0.00429145	0.00106955	0.557114	0.000270873	0.682438	78184.8	9761.3	5.99514	2.71943	1.75602	0.660701	0.00963364	0.0696598	0.343049	0.379362	0.0165979	0.0105572	0.708225	0.000267918	0.408771	60168.8	6277.51
2	MAB	1.61642	153340	1027.35	159.906	142.526	0.16446	0.0804506	0.126004	0.00796245	0.0007215	0	0.00193673	0.000520654	0.536449	1.64514e-06	1.50566	189799	4277.57	29.0418	18.0329	0.220148	0.235581	0.0794837	0.0133898	0.0026409	0.0768717	0.00580456	0.000765745	0.609272	0.000707185	0.930527	234481	8146.38	40.5093	20.0803	0.318927	0.249454	0.0103841	0.00424922	0.00792143	1.25511	0.0431925	0.0183313	1.35961	0.000848466	0.53524	256692	2217.19
3	MAB	2.8445	104132	1429.22	342.179	331.787	0.0693506	0.155077	0.0642416	0.00324742	0.00049298	0	0.00384304	0.000266377	0.419617	9.56557e-06	2.66474	195825	1213.97	57.0561	45.7066	0.081733	0.085046	0.0466725	0.00193577	0.00230261	0.0475506	0.011683	0.00150763	0.598111	0.00171798	1.94132	254262	1031.44	49.3162	19.2774	0.0752297	0.0223697	0.00837517	3.39775e-05	0.00534616	0.621304	0.0848654	0.0292567	1.35549	0.00214322	1.24883	483361	143.637
4	MAB	0.755459	19681.2	433.275	11.6278	4.6652	1.32128	0.0616187	0.0021902	0.0856414	0.0989994	0	0	0.000665772	0.07049	1.47539e-06	1.10126	59951.1	9127.82	22.5397	14.6544	1.59789	0.668555	0.0220658	0.157838	0.118816	0.0139477	0.000161539	0.000358492	0.0530986	0.000164972	0.613484	127914	24114	40.4683	10.6239	2.55796	1.40522	0.0148779	0.188079	0.181429	0.584569	0.00617358	0.00759652	0.24623	0.000428707	0.458081	149195	15938.4
5	MAB	1.76922	195183	1545.73	165.906	146.886	0.255824	0.0939197	0.0952956	0.00610839	0.00132775	0	0	0.000210582	0.0543865	1.25148e-06	1.53383	215412	4764.9	51.7855	22.5206	0.418286	0.314799	0.0714317	0.0153429	0.00183299	0.0254037	0.000857475	0.000298854	0.0748806	0.00133516	1.12181	196603	4777.54	92.4566	53.5996	0.47442	0.47335	0.0139669	0.0118523	0.00921202	1.48622	0.0450878	0.0200242	0.552637	0.00117385	0.741996	379682	4723.19
6	MAB	3.41071	171781	1016.36	92.6341	87.3512	0.112441	0.10135	0.0639164	0.000531419	7.59461e-05	0	0	0.000115842	0.0229263	2.60953e-06	3.26778	270217	1023.93	177.563	139.487	0.137489	0.0469381	0.0526322	0.000558266	0.000459397	0.0214352	0.00376972	0.00110785	0.0571181	0.00114845	3.08281	288738	498.287	63.6569	23.7436	0.0538558	0.0418917	0.0114108	0.000107298	0.00322201	0.766421	0.111289	0.0535035	0.344242	0.00149105	2.3155	793749	18.2296
7	MAB	0.778193	22593.4	574.318	11.3486	6.81571	0.733006	0.0422135	0.00286623	0.0340869	0.0972755	0	0	0.000584787	0.0830248	1.51499e-06	1.11353	64867.9	10738.7	17.8423	8.2811	1.00502	0.526381	0.0257749	0.11642	0.132569	0.00210792	7.06595e-05	0.00032832	0.0515746	0.000154044	0.615067	122708	24959.1	20.2825	8.12425	2.06341	1.00565	0.0177493	0.180618	0.155589	0.286521	0.00483341	0.0094184	0.524242	0.000611867	0.522982	119902	16052.4
8	MAB	1.80564	145350	1809.71	162.752	122.847	0.209884	0.0592903	0.0992931	0.00289588	0.0020527	0	0	0.000204117	0.0699824	1.77793e-07	1.61033	191135	5867.12	55.3064	34.0085	0.298956	0.128563	0.0790219	0.0137212	0.00255702	0.00179144	5.24705e-05	0.000199096	0.0746853	0.000548031	1.14792	300218	10320.7	82.5272	42.0925	0.443003	0.17942	0.0182188	0.0139906	0.0100997	0.38319	0.0213206	0.0226385	0.946783	0.0018243	1.09474	381752	5822.19
9	MAB	3.78179	101871	992.67	146.735	118.856	0.0896477	0.108629	0.0600397	0.00131613	0.000123623	0	0	6.71026e-05	0.0288092	1.23097e-06	3.32411	234068	1090.59	102.865	74.2247	0.170633	0.0516926	0.0565252	0.00110547	0.000365921	0.00470077	0.000478138	0.000426253	0.0492965	0.00484774	2.88523	233475	62.5981	112.494	12.8435	0.110262	0.0247845	0.0148909	0.000306336	0.00622265	0.34576	0.0597039	0.0353284	0.514163	0.00531018	2.89453	589723	583.403
10	MAB	0.849192	33178.5	826.667	17.4225	6.99077	0.636907	0.0301525	0.000145171	0.0184752	0.0834699	0	0	0.000633566	0.0914894	8.29946e-07	1.16552	84053.7	15116	17.1102	7.44612	0.903432	0.36332	0.0290449	0.0832707	0.104104	0	0	0.000226099	0.0547156	9.35989e-05	0.690288	147324	38208.6	20.3137	12.3528	1.50825	1.01201	0.0209525	0.141631	0.0982775	0.179598	0.000337303	0.0131747	0.640632	0.000818416	0.75614	122177	20675.6
11	MAB	1.67403	151201	2668.18	82.328	66.2029	0.155728	0.0301339	0.0901662	0.00184003	0.00165331	0	0	0.000265204	0.058896	7.40419e-08	1.56296	194080	6417.83	32.7327	18.1628	0.186096	0.0590492	0.0776143	0.00895794	0.00224337	0	0	0.00025899	0.05043	0.000246031	1.11155	311592	19157.2	71.2148	38.6773	0.321351	0.0606363	0.020794	0.0108711	0.0106438	0.281228	0.00654918	0.0313317	0.550469	0.00245364	1.50895	413507	6614.47
12	MAB	4.0926	186116	976.731	216.516	190.595	0.0632209	0.0965392	0.0627201	0.000288968	8.1737e-05	0	0	7.52988e-05	0.0253196	2.04722e-07	3.84735	200468	3927.93	47.6891	37.3654	0.108101	0.0401597	0.0613484	0.00115604	0.000638108	0	0	0.000403708	0.0381698	0.00418396	3.39083	358013	742.513	122.083	20.1135	0.0920077	0.0263669	0.0175455	0.000319132	0.00255492	0.129025	0.0214444	0.0457381	0.608455	0.0074555	3.71829	609670	266.012
13	MAB	3.33116	100455	2619.32	159.839	146.26	0.0479666	0.0671249	0.0677318	0.000294985	8.41728e-05	0	0	0.000105217	0.0168025	7.53584e-08	4.06498	175699	2142.62	61.5389	28.6379	0.0688986	0.0241981	0.0668716	0.00277957	0.000687922	0	0	0.000324418	0.0160818	0.00180764	3.40526	430213	4341.78	77.1734	18.9462	0.0794087	0.01412	0.0194537	0.00123362	0.00558966	0.127258	0.0132974	0.0395628	0.244685	0.00599761	4.03723	421939	1386.9
14	SNE	0.668444	5281.34	271.376	4.27517	1.72172	0.722611	0.0638969	1.29479e-06	0.0410729	0.273662	0	0	0.00101359	0.0286289	2.77868e-06	1.11745	47965.4	17528.8	6.28519	1.75156	1.303	0.362669	0.0301369	0.19175	0.456069	0	0	0.00026901	0.0151164	0.000219719	0.700792	73624.7	17568	2.41296	0.524366	1.46629	0.633691	0.0222807	0.367833	0.250998	0.0403603	0.0001554	0.0124618	0.166712	0.00155446	0.455606	38660.9	8854.55
15	SNE	0.976844	44759.5	1893.29	37.6218	16.698	0.371082	0.0267387	0.0119092	0.00547797	0.0185045	0	0	0.000601212	0.0261587	2.20368e-07	1.23398	135027	22156.4	27.5292	13.8067	0.613989	0.341613	0.0418234	0.0355199	0.0299066	0	0	0.000138708	0.0180594	2.61679e-05	0.750943	183859	58046.8	55.5945	26.3328	0.816039	0.805247	0.025203	0.0627033	0.0455164	0.120276	0.000963885	0.0158417	0.170509	0.00106574	0.828824	112701	23765.4
16	SNE	1.78478	96236.2	2575.85	79.1742	56.9065	0.154195	0.0338436	0.0942183	0.00141532	0.00195163	0	0	0.00033864	0.0120566	5.29245e-08	1.84805	217625	8711.78	52.8915	31.7272	0.222731	0.0574374	0.0843616	0.012721	0.00295501	0	0	0.000217337	0.00817134	0.000141277	1.29243	248179	14004.5	81.1985	43.524	0.356038	0.0741218	0.0240028	0.0159283	0.01834	0.110997	0.00549859	0.0240415	0.0901122	0.00220563	1.53638	260906	13893.2
17	SNE	3.47822	65366.9	1663.42	85.1013	61.6787	0.0579748	0.0453382	0.0682575	0.000290437	0.000121354	0	0	4.79053e-05	0.00112871	5.85128e-08	4.34699	245195	1705.1	74.9657	20.5367	0.0929594	0.0242073	0.0713804	0.00427111	0.00111757	0	0	7.63526e-05	0.000929695	0.000726969	4.74882	314410	3958.27	50.7039	22.511	0.100258	0.0282033	0.0229063	0.00154482	0.00806045	0.0159986	0.00583528	0.00661213	0.013933	0.00506565	5.48339	287762	2546.2
18	SNE	0.791567	17830.8	2250.38	7.04342	4.15447	0.762775	0.102986	0.00314759	0.0374446	0.244525	0	0	0.000657276	0.00488016	1.07402e-06	1.08403	41832.8	18772.6	10.4332	5.50118	1.29596	0.271111	0.0123448	0.158547	0.373877	0	0	0.00043464	0.00381444	0.000144844	0.731304	56510.1	18447.4	9.04393	3.87304	1.20248	0.318556	0.00970844	0.312044	0.282668	0.0135917	5.99019e-05	0.0140437	0.029812	0.00121563	0.37696	35631.1	8113.59
19	SNE	1.1655	58984.6	2920.09	68.4002	26.7697	0.293013	0.0288562	0.0403591	0.00420352	0.018164	0	0	0.000375793	0.00542826	6.64537e-08	1.3921	129815	38620.9	54.4063	24.4653	0.501185	0.147431	0.0526622	0.0315333	0.0208232	0	0	0.000126471	0.00367905	1.99636e-05	0.84459	211822	65302.5	70.0467	41.2967	0.54595	0.310724	0.0345648	0.0541643	0.0299115	0.0416534	0.00125183	0.017044	0.0282201	0.00101561	0.632236	107761	36863.6
20	SNE	2.07751	87424.6	1935.3	80.579	46.3175	0.133185	0.0382667	0.0879529	0.000919413	0.00101349	0	0	0.000213159	0.00113484	2.15983e-08	1.86258	169172	11292.6	74.9549	39.8883	0.202258	0.0990838	0.344592	0.0103357	0.00119339	0	0	0.000145784	0.000941106	7.14355e-05	1.43142	295900	24859.8	88.7415	56.1181	0.207285	0.139069	0.150886	0.0145964	0.00915638	0.00975295	0.002963	0.0188335	0.0132853	0.00206178	1.23266	191443	25498.1
21	SNE	2.95032	53354.7	1224.59	40.664	30.1547	0.0442113	0.0680927	0.0867581	0.000305021	0.000267253	0	0	8.30302e-05	0.000481234	4.24073e-08	2.57824	156778	4336.82	54.9654	28.5626	0.0908652	0.0316434	0.448265	0.00290218	0.00038276	0	0	8.0989e-05	0.000532186	0.000137736	2.6795	291502	11870.5	176.105	47.3038	0.0762449	0.022461	0.0493254	0.00231902	0.0114478	0.00351467	0.00191258	0.00869524	0.00741611	0.00354644	2.89378	200500	3590.82
22	SNE	0.717682	13511.9	1713.78	17.823	12.475	0.915043	0.10555	0.00955633	0.0442467	0.484103	0	0	0.000763864	0.00495743	5.24446e-07	0.99198	45792.6	20637.4	8.12869	5.09583	1.41647	0.241921	0.00437573	0.153876	0.409106	0	0	0.000567627	0.00438753	0.000161337	0.770846	46094.2	14155.4	7.27317	3.24951	1.52061	0.423312	0.0191338	0.313315	0.370552	0.00744874	8.04171e-05	0.0142186	0.0317471	0.00088524	0.346107	26490.2	3788.85
23	SNE	1.09254	49731.8	3683.77	53.8245	36.801	0.447215	0.0310125	0.0143197	0.00611972	0.0252884	0	0	0.000227894	0.00473768	5.48582e-08	1.43324	93534.1	36680.1	50.314	26.4484	0.618704	0.178715	0.0229992	0.0554036	0.0324208	0	0	0.000112802	0.00408073	1.70051e-05	1.03981	176536	66287.6	99.756	32.7235	0.771603	0.449031	0.0506199	0.15241	0.0421185	0.0103462	0.000131624	0.0108091	0.0168701	0.000587075	0.607051	106900	29496.1
24	SNE	2.1627	116487	1135.46	110.06	37.7058	0.151918	0.0231167	0.118508	0.00236442	0.00242157	0	0	0.000176166	0.00129065	9.43115e-09	3.43897	194492	22379.6	128.066	50.4168	0.210595	0.102619	0.25764	0.0409365	0.0147604	0	0	0.000128964	0.00102395	2.59767e-05	1.61634	261655	29259.8	202.261	51.9082	0.415402	0.193262	0.120658	0.0352166	0.0475205	0.00367711	0.000629276	0.0140186	0.00446377	0.00159727	1.19266	171048	17459.5
25	SNE	2.85086	102350	812.412	68.0949	19.6703	0.0777697	0.0346503	0.279209	0.00384245	0.000208141	0	0	0.000144559	0.00117181	1.548e-08	5.85094	164042	26337.3	81.0719	49.5111	0.109724	0.101803	0.381363	0.00741345	0.00329132	0	0	0.000105552	0.000746352	0.000184694	2.66038	273169	28215.4	339.843	196.691	0.289979	0.18215	0.0201743	0.00232043	0.00833579	0.00122684	0.000480169	0.00991179	0.00337104	0.00899658	2.38364	164163	1087.17
26	GB	0.619188	13286	2512.19	3.97909	2.59182	0.973204	0.092444	0.00413238	0.0406309	0.31443	0	0	0.000639576	0.00231226	4.42039e-07	1.00342	62187.5	32139.3	6.86195	3.85862	1.44439	0.165235	0.00100465	0.151714	0.32325	0	0	0.0005053	0.00220025	0.000112721	0.926653	63406.6	35564.8	17.0467	4.36709	1.53326	0.413002	0.00134584	0.448705	0.315975	0.00199958	7.99049e-05	0.0088112	0.0104859	0.00128117	0.405245	20144	2515.59
27	GB	1.02491	31190	3735.88	69.271	67.1448	0.453869	0.0309172	0.0155458	0.00507606	0.0271094	0	0	0.000216368	0.00273117	4.83496e-08	1.11012	143546	58568.9	60.4818	46.2901	0.643295	0.14084	0.00827992	0.0544413	0.0334254	0	0	9.76868e-05	0.0025033	9.91754e-06	1.10468	170607	59953.5	32.5719	19.0019	0.80096	0.508967	0.0121642	0.168835	0.0453813	0.00227943	2.39866e-05	0.0049937	0.0069142	0.000633336	0.750032	147194	48017.9
28	GB	0.666182	5255.86	1321.88	2.04254	1.55634	1.07314	0.0793804	0.00421966	0.0485523	0.309648	0	0	0.000249924	0.00119441	2.51924e-08	1.17128	53393.8	21778.6	1.77658	1.24211	1.53249	0.19354	0.0193293	0.156988	0.371683	0	0	0.000164329	0.00108052	3.95772e-06	0.995341	43595.6	21142.4	3.04707	0.988261	2.49667	0.645701	0.2061	0.593015	0.324843	0.000553461	9.94949e-06	0.00602888	0.00441258	0.00146333	0.66885	20831.7	5792.21
29	GB	0.799548	20793.7	3638.5	54.9201	52.912	0.507116	0.0149962	0.0174533	0.00576953	0.0162486	0	0	0.00018494	0.00178602	1.95973e-08	1.2711	132418	40767.1	38.4217	26.8236	0.5904	0.157627	0.0114614	0.0613543	0.029403	0	0	8.73479e-05	0.00153889	2.47248e-06	1.11502	129684	37696.7	43.2214	29.6964	1.25436	0.619705	0.112047	0.298718	0.031559	0.000352397	3.45134e-06	0.00186228	0.00297658	0.000830577	1.0414	107015	14991.2
30	GB	1.81704	37275.5	2930.43	59.8587	51.9957	0.223013	0.0241646	0.033327	0.00149918	0.00386879	0	0	0.000448616	0.00182568	9.72367e-09	2.69279	142399	32323	67.2608	38.5499	0.279933	0.0572197	0.0287695	0.0493212	0.00989616	0	0	0.000187843	0.00134955	4.81078e-06	1.81945	228246	21511.8	92.3579	23.1718	0.473716	0.139772	0.0152236	0.0817186	0.0542885	0.000419329	3.17059e-06	0.00283551	0.00211421	0.000730407	1.70374	228677	9918.47
31	GB	1.59679	31171.2	2621.35	55.8608	41.5388	0.23819	0.0511427	0.0258295	0.00391051	0.00121033	0	0	0.000515624	0.00292936	8.18905e-09	2.82335	93063.6	18184.9	57.256	48.0043	0.269864	0.163041	0.0520312	0.078045	0.00418956	0	0	0.000219733	0.00196386	4.74637e-06	1.92761	199796	27975.5	63.7843	25.617	0.543811	0.872016	0.0723253	0.160362	0.0260628	6.40316e-05	1.77298e-06	0.00471355	0.00331966	0.000903744	1.88399	219082	2281.3
32	GB	0.717429	12635.8	4722.1	7.66044	6.795	0.614036	0.0486489	0.0178529	0.0257988	0.0193035	0	0	0.000263166	0.00140605	8.34069e-09	1.29328	72307.8	25159.2	10.851	8.59835	0.699199	0.239415	0.0879482	0.176414	0.0373259	0	0	0.000128168	0.00111504	1.85382e-06	1.14388	137350	64953.8	13.8794	12.8699	1.95036	1.34325	0.908682	1.00514	0.0654712	0	2.20614e-06	0.00700204	0.00238408	0.000884295	1.00693	69317.7	12065.2
33	GOM	1.19236	35962.8	1961.49	15.8925	8.60549	0.436487	0.0642667	0.251039	0.00906863	0.00342228	0	0	0.000297703	0.00199256	1.10408e-08	1.94945	95035	32047.1	114.302	106.988	0.552801	0.494062	0.762507	0.0815322	0.00392824	0	0	0.000129376	0.0012257	4.79959e-06	1.59947	151183	51429.6	93.3736	58.1887	1.31842	2.22645	1.12703	0.285536	0.0192719	0.000376443	0.000176034	0.00694471	0.00379768	0.00110182	1.37208	92963.8	10248.9
34	GOM	0.723268	19089.5	7106.63	0.867619	0.693492	0.394388	0.0363318	0.15019	0.0203616	0.00490901	0	0	0.000102975	0.000989472	2.18069e-08	1.39262	68715	19770.9	1.06503	0.642416	0.396741	0.120452	0.327691	0.118271	0.00660517	0	0	4.74879e-05	0.000712275	5.18159e-06	1.13194	113786	67127	0.716914	0.415943	0.913503	0.49038	1.41249	0.601404	0.0216866	1.11667e-05	7.39328e-05	0.00363663	0.00183194	0.00141593	0.895733	70209.2	32260.3
35	GOM	2.54159	118255	1439.51	108.801	65.1573	0.163918	0.0586095	0.16166	0.00815775	4.50241e-05	0	0	1.51067e-05	0.000817732	1.97668e-09	4.45054	280714	90073.1	56.9438	23.836	0.235102	0.244321	0.409289	0.0141289	0.000125899	0	0	1.21301e-05	0.000643693	2.39965e-05	5.56155	626864	109108	103.125	21.0035	0.465478	0.435445	0.0159091	0.0120558	0.00160954	0	0.000151677	0.00107078	0.00678251	0.00396539	4.06435	367482	69170.7
36	GOM	1.15104	39558.8	4309.56	39.0554	20.9343	0.475738	0.0958949	0.412994	0.0202022	0.000280246	0	0	3.63944e-05	0.00152796	5.6474e-09	2.40347	172555	68070.1	32.4017	30.2705	0.532901	0.387199	0.281337	0.0518972	0.00036939	0	0	1.79999e-05	0.000930036	3.13642e-06	1.99533	267002	93902.6	33.2571	17.2494	0.908435	1.64393	0.0490732	0.237836	0.00552229	0	4.16248e-05	0.000822498	0.00717494	0.00151751	1.49183	135207	46220.6
37	GOM	0.698387	18393.6	11463.4	1.60014	1.58082	0.307305	0.0296571	0.118772	0.0266575	0.00140514	0	0	3.57816e-05	0.000629375	6.2064e-09	1.40316	54841.7	18967.8	0.598902	0.266341	0.346033	0.0491546	0.123403	0.07354	0.00221591	0	0	1.92887e-05	0.00043149	1.56932e-06	0.996067	87940.9	58173.8	1.68246	1.57008	0.736272	0.20778	0.45334	0.407205	0.00515452	0	2.24944e-05	0.00107208	0.00136991	0.000815011	0.924537	65337.6	38453.3
39	GOM	0.726121	7855.53	4435.11	0.252692	0.236538	0.530267	0.0231442	NaN	0.0407	0.0910244	NaN	NaN	NaN	NaN	3.68541e-09	1.24125	36357	22935.6	0.159302	0.0962791	0.587921	0.0582405	0.183751	0.129081	0.173886	NaN	NaN	NaN	NaN	6.66327e-07	0.936668	42218	31654.1	0.0929268	0.0814634	1.68086	0.207343	1.26073	0.548461	0.2281	NaN	NaN	NaN	NaN	0.00113314	0.839911	51152.1	21823.8
40	GOM	2.07581	29204.3	3049.46	32.9222	29.2503	0.260695	0.0143172	0.0207582	0.051289	0.00660548	0	0	9.11962e-05	0.000595165	6.19717e-09	4.3778	194044	68095.9	7.49474	7.05026	0.292729	0.027781	0.0428479	0.114256	0.0112238	0	0	4.81248e-05	0.000437214	1.5359e-06	7.33519	203762	49576.3	12.7888	9.90263	0.720382	0.132651	0.696534	0.676422	0.0256776	0	6.03409e-07	0.00221686	0.000906903	0.00123757	5.38117	415208	58452.4
41	GOM	0.894236	15540.9	6957.2	2.46	2.19755	0.391392	0.0181396	0.0030217	0.0551094	0.0508892	0	0	0.000263454	0.000239487	1.53496e-09	1.30694	72974	28347.1	1.3003	1.20815	0.517408	0.0303697	0.070292	0.157548	0.13328	0	0	0.000137583	0.000188114	4.4221e-07	1.45093	84787.7	52831.7	0.800482	0.739639	1.3609	0.130812	0.694136	0.767189	0.180594	0	6.8175e-07	0.00509144	0.000366196	0.000354908	1.22572	110855	51322.4
42	GOM	0.751781	12600.7	8202.13	1.1275	1.0874	0.310952	0.12126	0.0269303	0.013335	3.63468e-05	0	0	7.74796e-05	0.00028117	1.60124e-09	1.25463	42122.4	14400.1	0.332951	0.221393	0.355667	0.131048	0.0166517	0.0457291	8.532e-05	0	0	3.42712e-05	0.00013139	3.82372e-06	1.1366	55095.1	38932.1	0.297623	0.256233	0.472564	0.541703	0.000505313	0.0876954	0.00197885	0	0	0.000824518	0.00149697	0.00219463	0.9789	73481.4	37087.8
43	GOM	0.851505	9125.06	3808.75	6.37871	6.15613	0.346314	0.0487461	0.288871	0.0273459	0.00025861	0	0	5.85936e-05	0.000397635	7.01172e-09	1.16072	80155.6	23611.6	2.68833	2.13981	0.37834	0.0983357	0.0859881	0.0427075	0.000413469	0	0	2.95793e-05	0.000227099	2.21839e-06	1.1395	73144	35588.1	1.67633	0.829114	1.02364	0.677485	0.145398	0.338258	0.00154624	0	0	0.000647	0.000628899	0.00234383	1.24059	98981.4	29054.4
44	GOM	1.27132	11425.6	1315.07	44.6014	37.2286	0.197752	0.0113146	0.137117	0.0512074	0.00189048	0	0	5.5876e-05	0.000212688	4.23934e-09	1.23393	92437.7	31462.5	50.8023	49.2818	0.221852	0.0179131	0.0231175	0.0511684	0.00399906	0	0	2.9841e-05	0.000142869	7.94514e-07	1.1258	134440	39356.7	151.687	147.147	0.662505	0.202561	0.0125195	0.23725	0.00721943	0	0	0.000585351	0.000262614	0.00145461	1.38046	105723	23848.7
45	GOM	1.72946	7133.22	4134.64	37.7937	34.2058	0.342322	0.0197941	0.00106053	0.0246559	0.00123987	0	0	7.98883e-05	6.19595e-05	3.81006e-09	1.8378	57879.2	18997.3	6.36304	5.66717	0.397138	0.0586108	0.000208828	0.0281555	0.00251464	0	0	3.4723e-05	3.32625e-05	6.51385e-07	2.67571	88846.8	20692.9	7.09957	6.43743	1.0968	1.03687	0.000923084	0.151613	0.00393536	0	0	0.000308083	4.61431e-05	0.00283632	2.66545	199974	20864.1
46	GOM	1.10882	8295.75	4775.91	15.9362	15.8162	0.308532	0.0152189	NaN	0.00974296	0.000339914	NaN	NaN	NaN	NaN	6.40023e-10	1.26864	42198.1	19405.2	1.39778	0.426667	0.322983	0.104678	NaN	0.00728682	0.00045345	NaN	NaN	NaN	NaN	9.79005e-08	1.40465	61927	30809.1	83.177	82.6265	1.05277	1.42882	NaN	0.0186275	0.000537521	NaN	NaN	NaN	NaN	0.000820892	1.60874	91721.3	34362.8
47	GOM	0.845548	13995.7	1944.42	3.5814	1.74744	0.378217	0.0808036	0.0142182	0.0155008	9.01967e-05	0	0	6.26661e-05	7.74158e-05	1.03487e-09	1.16866	55066.3	21569.6	0.296923	0.242308	0.409555	0.186043	0.0094835	0.0230183	9.18027e-05	0	0	2.61495e-05	4.58888e-05	7.27993e-07	0.822042	83527.6	33950.6	7.61071	1.15186	1.18343	1.53726	0.00277899	0.171527	0.00212257	0	0	0.000111418	0.000148512	0.00119348	0.912912	92557.3	31584.9
381	GOM	0.766834	4653.24	1987.31	3.25147	0.419706	0.303952	0.0638293	0.000191337	0.0310103	0.00031779	0	0	8.59319e-05	2.82046e-05	4.90927e-09	1.19794	38323.8	20434.2	1.21145	0.120435	0.313052	0.12672	0.000369833	0.0236744	0.000316362	0	0	3.30736e-05	1.1948e-05	6.40612e-07	0.902485	41037.2	24242.3	1.09024	0.617711	1.12647	1.2609	0.00263287	0.083889	0.000587881	0	0	8.60318e-05	2.89649e-05	0.00341856	0.749272	22276.8	6613.65
382	GOM	0.668773	14939.8	5779.86	1.5871	1.5671	0.443623	0.0107727	NaN	0.0185659	0.0109742	NaN	NaN	NaN	NaN	3.00503e-09	1.27389	36286.8	14987	0.328989	0.27573	0.500103	0.18862	NaN	0.0496052	0.0227249	NaN	NaN	NaN	NaN	4.20763e-07	1.02118	65995	46472.8	0.310609	0.29287	1.71983	1.12431	NaN	0.199115	0.0310506	NaN	NaN	NaN	NaN	0.00212619	0.826483	59273.1	28574.8
[truncated: 42 more columns]

## Sheet: Annual Averages+SD in subregion
Subregion	Chlorophyll a [mg m-3]	SD	Zooplankton [# 100m-3]	SD	C. finmarchicus [# 100m-3]	SD	Fish larvae [# 100m-3]	SD	Commercial fish larvae [# 100m-3]	SD	North Atlantic Right whale [# 100 km-2]	SD	Kemp's Ridley sea turtle [# 100 km-2]	SD	Roseate Tern [# 100 km-2]	SD	Benthic fishing activity	SD	Pelagic fishing activity	SD
Mid-Atlantic Bight	1.93323	1.2289	218186	154006	4696.75	6821.56	74.9315	62.4808	54.3817	58.6624	0.0289639	0.0294745	0.0186029	0.0261898	0.00090263	0.0014282	1187.06	1279.09	717.505	2260.65
Southern New England	1.81199	1.33951	142279	106093	11586.9	15057.5	83.1245	89.8258	47.4435	63.2782	0.0499702	0.0894006	0.00160608	0.00286009	0.00137639	0.00218978	2324.31	1064.44	150.922	254.104
Georges Bank	1.29358	0.592894	88017.8	64648.1	15287.8	18458.3	30.1811	28.9733	22.7971	23.7621	0.0738746	0.214761	4.69574e-05	8.74283e-05	0.000654145	0.00053587	739.718	325.419	470.495	881.021
Gulf of Maine	1.7253	1.41317	87186.2	92622.5	23454.1	22064	45.119	205.21	39.4176	202.757	0.20727	0.350158	7.20778e-05	0.000225773	0.00124755	0.00153198	714.886	835.271	618.986	835.734

## Sheet: Annual fishing footpring
Strata	Region	Benthic Landings [lbs km-2]	Benthic revenue [USD km-2]	Pelagic Landings [lbs km-2]	Pelagic revenue [USD km-2]
1	MAB	304.905	0.404263	279.868	1.79261
2	MAB	225.166	0.622806	193.101	2.24048
3	MAB	290.735	0	596.042	0
4	MAB	875.314	0.0609174	625.371	0.19108
5	MAB	86.8944	0.100026	89.9944	0.385347
6	MAB	636.68	0	136.343	0
7	MAB	3420.91	81.3299	8346.47	26.1703
8	MAB	1741.85	566.072	7847	69.7455
9	MAB	397.695	39.8996	418.961	5.21954
10	MAB	3983.97	78.9031	9987.62	25.6225
11	MAB	1978.55	54.6716	5356.66	7.10504
12	MAB	130.586	8221.97	612.758	1051.99
13	MAB	1358.57	283.528	1066.95	37.1579
14	SNE	2351.56	0	3725.05	0
15	SNE	2791.02	286.383	7613.23	55.7458
16	SNE	2047.29	867.144	6469.65	155.817
17	SNE	1132.18	9.09306	1492.59	25.3931
18	SNE	1196.9	0	1837.74	0
19	SNE	1774.95	11.7449	2507.18	1.96813
20	SNE	3292.83	129.969	4408.11	22.8527
21	SNE	4565.51	301.299	3905.99	109.04
22	SNE	3348.49	0	2749.14	0
23	SNE	2050.81	1.11136	10042.7	0.483971
24	SNE	884.861	0.0177899	2984.67	0.0636291
25	SNE	2455.36	204.296	3051	58.7952
26	GB	521.259	0	1254.39	0
27	GB	758.026	0	4608.87	0
28	GB	498.831	0	2065.74	0
29	GB	359.11	0	2759.51	0
30	GB	937.005	11.981	1686.43	2.84868
31	GB	1326.31	999.44	2572.7	227.803
32	GB	777.488	2282.04	1993.59	520.188
33	GOM	3148.43	1797.53	10909.5	429.482
34	GOM	892.347	568.847	1783.63	127.687
35	GOM	1571.19	1104.87	5448.21	364.55
36	GOM	1337.03	1443.37	3779.9	443.885
37	GOM	1357.12	27.5285	1649.09	6.24577
39	GOM	147.191	54.7641	618.779	13.2913
40	GOM	806.743	2804.1	2659.67	804.087
41	GOM	534.859	820.119	977.851	223.511
42	GOM	385.342	6.86461	769.361	1.81561
43	GOM	11.3274	0	36.213	0
44	GOM	NaN	NaN	NaN	NaN
45	GOM	424.926	1085.17	1724.4	311.071
46	GOM	86.9061	14.1181	290.943	4.57921
47	GOM	NaN	NaN	NaN	NaN
381	GOM	NaN	NaN	NaN	NaN
382	GOM	734.76	176.503	1336.86	41.47

## Sheet: Metrics
		January/February										March/April										May/June										July/August										September/October
Strata	Region	Chlorophyll a	Zooplankton	C. finmarchicus	Fish larvae	Commercial fish larvae	North Atlantic Right whale	Kemp's Ridley sea turtle	Roseate Tern	Benthic fishing activity	Pelagic fishing activity	Chlorophyll a	Zooplankton	C. finmarchicus	Fish larvae	Commercial fish larvae	North Atlantic Right whale	Kemp's Ridley sea turtle	Roseate Tern	Benthic fishing activity	Pelagic fishing activity	Chlorophyll a	Zooplankton	C. finmarchicus	Fish larvae	Commercial fish larvae	North Atlantic Right whale	Kemp's Ridley sea turtle	Roseate Tern	Benthic fishing activity	Pelagic fishing activity	Chlorophyll a	Zooplankton	C. finmarchicus	Fish larvae	Commercial fish larvae	North Atlantic Right whale	Kemp's Ridley sea turtle	Roseate Tern	Benthic fishing activity	Pelagic fishing activity	Chlorophyll a	Zooplankton	C. finmarchicus	Fish larvae	Commercial fish larvae	North Atlantic Right whale	Kemp's Ridley sea turtle	Roseate Tern
1	MAB	-0.860495	-1.32205	-0.667504	-0.483581	-0.374623	0.838694	-0.6485	-0.630301	-0.689675	-0.31721	-0.674233	-0.984672	-0.00644296	-1.04854	-0.846012	0.332185	-0.546453	-0.442346	-0.689675	-0.31721	-1.01782	-0.909062	0.23173	-1.10332	-0.880671	-0.65583	-0.0765576	-0.444416	-0.689675	-0.31721	-1.24051	-1.02604	-0.169892	-1.01241	-0.768763	-0.769615	-0.0863847	-0.519996	-0.689675	-0.31721	-0.985676	-0.926742	-0.642197	-1.0442	-0.850819	-0.854091	-0.281828	-0.540803
2	MAB	-0.257801	-0.421057	-0.537913	1.36001	1.50256	3.29235	-0.636362	-0.630855	-0.752014	-0.317113	-0.347929	-0.184323	-0.0614493	-0.73446	-0.619626	1.71402	-0.488678	-0.136848	-0.752014	-0.317113	-0.815939	0.105807	-0.36349	-0.550923	-0.584725	-0.630368	0.938896	-0.0379249	-0.752014	-0.317113	-1.1376	0.250034	-0.582561	-0.200843	-0.123644	-0.769615	0.691038	-0.365284	-0.752014	-0.317113	-0.71919	-0.238188	-0.629809	-0.116296	-0.217872	-0.788952	0.475378	-0.398178
3	MAB	0.741533	-0.740581	-0.479001	4.27727	4.72883	1.19689	-0.563575	-0.62531	-0.700752	-0.317389	0.595254	-0.145195	-0.510556	-0.286093	-0.147882	0.60081	-0.264222	0.570897	-0.700752	-0.317389	0.00657579	0.234251	-0.66746	-0.409969	-0.598412	-0.698527	2.53008	0.868644	-0.700752	-0.317389	-0.556924	1.72186	-0.668957	-0.280206	-0.100263	-0.769615	2.39989	0.00612186	-0.700752	-0.317389	0.332695	0.603776	-0.657695	0.509205	0.715792	-0.765871	2.32237	-0.0357354
4	MAB	-0.958399	-1.28894	-0.625001	-1.01317	-0.847502	-0.908369	-0.710312	-0.630974	-0.243727	-0.317362	-0.677008	-1.02746	0.649568	-0.838526	-0.677219	-0.234036	-0.704144	-0.516496	-0.243727	-0.317362	-1.07393	-0.586155	1.64796	-0.551579	-0.745926	-0.477906	-0.474588	-0.331834	-0.243727	-0.317362	-1.20039	-0.447977	0.163173	-0.906228	-0.786084	-0.769615	-0.273408	-0.577536	-0.243727	-0.317362	-1.12946	-0.963804	-0.461781	-0.817174	-0.778612	-0.876146	-0.574714	-0.587936
5	MAB	-0.133468	-0.149363	-0.461922	1.45604	1.57689	2.25048	-0.710312	-0.631131	-0.860116	-0.317344	-0.325014	-0.0180078	0.00998947	-0.370448	-0.543127	1.44083	-0.677572	0.302847	-0.860116	-0.317344	-0.660284	-0.140141	0.00387531	0.280489	-0.0133322	-0.508814	1.01127	0.189906	-0.860116	-0.317344	-0.969354	1.04864	-0.391867	0.0691027	0.0970584	-0.769615	1.18275	-0.532117	-0.860116	-0.317344	-0.631318	0.435389	-0.591165	0.633634	0.567017	-0.818166	0.322224	-0.453398
6	MAB	1.20228	-0.301316	-0.539524	0.28333	0.562021	1.18586	-0.710312	-0.63018	-0.430292	-0.317389	1.08597	0.337856	-0.538414	1.64261	1.45076	0.803011	-0.566374	0.172122	-0.430292	-0.317389	0.935447	0.458118	-0.685844	-0.180448	-0.522278	-0.595536	3.53901	0.412005	-0.430292	-0.317389	0.311065	3.73729	-0.664479	-0.264663	-0.0691215	-0.769615	3.09731	-0.328532	-0.430292	-0.317389	1.08676	1.42778	-0.490507	1.72523	1.86844	-0.765871	2.37207	0.153897
7	MAB	-0.939899	-1.27003	-0.604325	-1.01764	-0.810843	-0.885432	-0.710312	-0.630946	1.74643	-0.281412	-0.667021	-0.995532	0.885714	-0.913707	-0.785863	-0.108196	-0.707614	-0.524148	1.74643	-0.281412	-1.07264	-0.619963	1.66467	-0.874651	-0.788537	-0.380486	-0.525759	-0.203588	1.74643	-0.281412	-1.14757	-0.638182	0.443415	-0.88755	-0.731088	-0.769615	-0.279584	-0.536422	1.74643	-0.281412	-1.15192	-0.980413	-0.490849	-1.00488	-0.842259	-0.876146	-0.5825	-0.567938
8	MAB	-0.103827	-0.472942	-0.423223	1.40555	1.1671	2.38611	-0.710312	-0.631883	0.433733	-0.0669864	-0.26276	-0.175649	0.171569	-0.314096	-0.347295	1.69835	-0.708309	-0.248285	0.433733	-0.0669864	-0.639041	0.532656	0.164982	0.121569	-0.209491	-0.364556	0.103768	0.645335	0.433733	-0.0669864	-0.682317	1.06208	0.0870966	0.704475	0.580915	-0.769615	0.880595	-0.441587	0.433733	-0.0669864	-0.532373	1.95302	-0.476572	0.620905	0.671934	-0.814116	-0.00731222	-0.429835
9	MAB	1.50423	-0.755264	-0.542997	1.14921	1.09907	1.05433	-0.710312	-0.631145	-0.617131	-0.299739	1.1318	0.103129	-0.528643	0.447077	0.338257	0.935089	-0.692056	2.7623	-0.617131	-0.299739	0.77467	0.0992754	-0.602993	0.601178	-0.708088	-0.477465	1.56935	3.0861	-0.617131	-0.299739	0.782238	2.41249	-0.676484	0.410161	0.126839	-0.769615	1.76976	0.143195	-0.617131	-0.299739	1.59422	0.860829	-0.649577	1.79935	1.66463	-0.765871	1.16014	0.266771
10	MAB	-0.882125	-1.2013	-0.567332	-0.920426	-0.807859	-0.977752	-0.710312	-0.631426	2.18663	-0.282486	-0.624718	-0.870954	1.52739	-0.925424	-0.800096	0.00274716	-0.710312	-0.566471	2.18663	-0.282486	-1.01143	-0.460122	2.34241	-0.874152	-0.716454	-0.271807	-0.697433	-0.0589651	2.18663	-0.282486	-0.957845	-0.623408	0.46658	-0.667915	-0.599877	-0.769615	-0.663619	-0.480287	2.18663	-0.282486	-1.10245	-0.876268	-0.47518	-0.981971	-0.814606	-0.876146	-0.69495	-0.548486
11	MAB	-0.210928	-0.434951	-0.297376	0.118381	0.201512	2.07645	-0.710312	-0.631955	0.618787	-0.293205	-0.301303	-0.156521	0.252299	-0.675387	-0.617413	1.65059	-0.710312	-0.45974	0.618787	-0.293205	-0.668636	0.606512	0.281127	-0.0594854	-0.267709	-0.277187	-0.460246	1.08599	0.618787	-0.293205	-0.345252	1.26828	0.230898	0.209411	0.16632	-0.769615	-0.031158	-0.306501	0.618787	-0.293205	-0.672358	1.32177	-0.551684	1.10964	1.25854	-0.829117	-0.407002	-0.392992
12	MAB	1.75716	-0.208236	-0.545333	2.26604	2.32199	1.14527	-0.710312	-0.631864	-0.825958	3.3196	1.55758	-0.115044	-0.112705	-0.436011	-0.290072	1.09873	-0.710312	2.29754	-0.825958	3.3196	1.1861	0.907934	-0.649521	0.754664	-0.58416	-0.387398	0.108493	4.58821	-0.825958	3.3196	1.45256	2.54201	-0.678527	0.735109	0.959193	-0.769615	0.645124	1.08314	-0.825958	3.3196	1.9437	1.5672	-0.638594	0.704156	0.537606	-0.765871	0.336317	0.714713
13	MAB	1.13754	-0.764458	-0.304539	1.35894	1.56622	1.3153	-0.710312	-0.631954	0.134088	-0.19197	1.73468	-0.275877	-0.374421	-0.214346	-0.438847	1.28612	-0.710312	0.633671	0.134088	-0.19197	1.19784	1.37675	-0.485205	0.0358822	-0.604058	-0.322658	-0.20258	3.56742	0.134088	-0.19197	1.7121	1.32303	-0.606916	0.61719	0.726061	-0.769615	0.324763	1.26342	0.134088	-0.19197	1.66379	1.00471	-0.315834	0.898822	0.925615	-0.765871	-0.0359157	0.631938
14	SNE	-0.853707	-1.2913	-0.751487	-0.877802	-0.722552	-0.558933	-0.561549	-0.627282	0.0255962	-0.593936	-0.518505	-0.888969	0.394615	-0.855425	-0.722081	-0.221848	-0.561549	-0.528212	0.0255962	-0.593936	-0.829558	-0.647112	-0.181459	-0.898534	-0.741474	-0.309725	-0.507215	0.0813195	0.0255962	-0.593936	-1.0126	-0.97667	-0.593255	-0.798794	-0.672213	-0.488703	-0.403881	-0.325498	0.0255962	-0.593936	-1.03049	-1.1686	-0.716805	-0.846656	-0.717202	-0.523825	-0.500389	-0.480857
15	SNE	-0.623473	-0.919187	-0.643772	-0.506566	-0.485878	-0.425736	-0.561549	-0.62845	0.438454	0.533092	-0.431512	-0.0683507	0.701951	-0.618923	-0.531571	-0.0911273	-0.561549	-0.616601	0.438454	0.533092	-0.792118	0.391922	0.808807	-0.306482	-0.333618	-0.277036	-0.224537	-0.141862	0.438454	0.533092	-0.733976	-0.278792	-0.00852505	-0.510064	-0.402954	-0.488703	0.45632	-0.428611	0.438454	0.533092	-0.880619	-0.339571	-0.611604	-0.381262	-0.263717	-0.522801	-0.0894627	-0.538256
16	SNE	-0.0203142	-0.433983	-0.598441	-0.0439774	0.149547	0.494941	-0.561549	-0.628527	-0.260251	2.81862	0.0269216	0.710195	-0.19094	-0.336573	-0.248368	0.384689	-0.561549	-0.564034	-0.260251	2.81862	-0.387876	0.998179	0.15317	-0.021441	-0.06194	-0.290462	1.36097	0.378685	-0.260251	2.81862	-0.205758	1.11814	-0.467306	0.342175	0.678002	-0.488703	4.0195	-0.286105	-0.260251	2.81862	-0.399162	2.70384	-0.627179	1.01414	1.64156	-0.500276	2.20153	-0.419559
17	SNE	1.24391	-0.724948	-0.659038	0.0220077	0.224962	0.204555	-0.561549	-0.628524	-1.11997	-0.558151	1.89249	0.970053	-0.65627	-0.0908282	-0.425215	0.239486	-0.561549	-0.296568	-1.11997	-0.558151	2.19247	1.62245	-0.600411	-0.360926	-0.394015	-0.302726	1.47869	1.68476	-1.11997	-0.558151	2.74086	1.37128	-0.74631	-0.0598042	0.201482	-0.488703	3.34896	2.15643	-1.11997	-0.558151	2.92767	4.1129	-0.625739	-0.128183	0.0676682	-0.487469	2.71958	0.946543
18	SNE	-0.76179	-1.17301	-0.620057	-0.846984	-0.684107	-0.52374	-0.561549	-0.62806	-1.05916	-0.593936	-0.543454	-0.946774	0.47722	-0.809247	-0.662825	-0.420863	-0.561549	-0.562405	-1.05916	-0.593936	-0.806779	-0.808429	-0.230668	-0.824713	-0.688555	-0.450353	-0.540605	-0.0734115	-1.05916	-0.593936	-1.07131	-1.00523	-0.615198	-0.699224	-0.536058	-0.528839	-0.511464	-0.172773	-1.05916	-0.593936	-1.00025	-1.0262	-0.692596	-0.841906	-0.691168	-0.536857	-0.536207	-0.389609
19	SNE	-0.482633	-0.785106	-0.57558	-0.16392	-0.326712	-0.107506	-0.561549	-0.62852	-0.516104	-0.547715	-0.313469	-0.11748	1.7954	-0.31971	-0.36313	0.0301111	-0.561549	-0.619434	-0.516104	-0.547715	-0.722206	0.655496	1.67868	-0.14559	-0.0971393	-0.172319	-0.123859	-0.164756	-0.516104	-0.547715	-0.880738	-0.325353	-0.365064	-0.212945	-0.267805	-0.506951	0.726138	-0.284089	-0.516104	-0.547715	-0.801282	-0.436327	-0.665294	0.423145	0.386944	-0.485954	0.198427	-0.46431
20	SNE	0.198225	-0.517039	-0.640982	-0.0283382	-0.0177938	0.424859	-0.561549	-0.628541	0.909886	-0.0824559	0.0377678	0.253491	-0.0195428	-0.0909484	-0.119397	3.29553	-0.561549	-0.595929	0.909886	-0.0824559	-0.28411	1.44799	0.923881	0.0625322	0.137086	1.1288	0.474431	0.312996	0.909886	-0.0824559	-0.432496	0.463411	-0.625105	-0.236374	-0.000365154	-0.498552	2.29499	0.123177	0.909886	-0.0824559	-0.0861103	0.749865	-0.675802	0.849499	1.14799	-0.455256	1.62962	-0.2013
21	SNE	0.849814	-0.838171	-0.688182	-0.472698	-0.27322	0.411495	-0.561549	-0.628531	2.10552	0.591796	0.57204	0.136668	-0.481492	-0.313485	-0.298379	4.45517	-0.561549	-0.565651	2.10552	0.591796	0.647637	1.40653	-0.531035	1.03512	-0.00220692	-0.00721232	0.107165	0.990989	2.10552	0.591796	0.807602	0.548776	-0.748288	-0.701277	-0.58598	-0.515899	1.41897	1.55843	2.10552	0.591796	1.5592	0.995922	-0.713469	0.46648	0.516198	-0.517041	1.09843	0.721623
22	SNE	-0.816948	-1.21372	-0.655694	-0.726979	-0.552616	-0.452054	-0.561549	-0.628311	0.96218	-0.593936	-0.612173	-0.909449	0.601065	-0.834902	-0.66923	-0.510002	-0.561549	-0.554874	0.96218	-0.593936	-0.777259	-0.906607	-0.517883	-0.844426	-0.698408	-0.344925	-0.533432	-0.224291	0.96218	-0.593936	-1.09435	-1.09139	-0.707867	-0.846569	-0.66975	-0.55804	-0.487013	-0.199201	0.96218	-0.593936	-0.992433	-1.15635	-0.727573	-0.816592	-0.655318	-0.546937	-0.526241	-0.43282
23	SNE	-0.537102	-0.87232	-0.524862	-0.326186	-0.168187	-0.398773	-0.561549	-0.628526	-0.25695	-0.589562	-0.282754	-0.459453	1.6665	-0.365267	-0.33179	-0.301688	-0.561549	-0.620785	-0.25695	-0.589562	-0.576463	0.322898	1.18939	0.185153	-0.232624	0.00726689	-0.515528	-0.360453	-0.25695	-0.589562	-0.899539	-0.333468	-0.512544	-0.100244	0.256611	-0.520998	-0.234941	-0.151784	-0.25695	-0.589562	-0.723489	-0.537527	-0.627179	-0.12282	0.186485	-0.542417	-0.361127	-0.374497
24	SNE	0.26182	-0.243106	-0.694101	0.299863	-0.153887	0.766635	-0.561549	-0.628546	-1.35232	-0.593866	1.21461	0.492149	0.71677	0.50032	0.0469882	2.32291	-0.561549	-0.616688	-1.35232	-0.593866	-0.146058	1.12521	0.390015	1.3263	0.0705561	0.790683	-0.34153	0.10087	-1.35232	-0.593866	-0.46236	0.271172	-0.620967	2.48047	1.48993	-0.539196	0.826334	0.488342	-1.35232	-0.593866	-0.150842	0.525928	-0.685266	2.03733	2.96245	-0.535886	0.472077	0.0550464
25	SNE	0.775562	-0.376356	-0.715555	-0.167319	-0.438907	2.56417	-0.561549	-0.628544	0.123113	0.21005	3.01525	0.205136	0.97961	-0.0228507	0.0326748	3.70683	-0.561549	-0.544207	0.123113	0.21005	0.633363	1.23373	-0.697308	2.85796	2.35859	-0.333285	-0.393663	3.47989	0.123113	0.21005	0.426759	0.206275	-0.689738	2.55722	-0.698112	-0.554965	0.836788	4.53844	0.123113	0.21005	0.677642	0.56561	-0.675059	4.0011	5.56093	-0.551254	0.341697	2.52322
26	GB	-1.13747	-1.15598	-0.692133	-0.904352	-0.850316	-0.324743	-0.537095	-1.21989	-0.671316	-0.534034	-0.489397	-0.399553	0.912952	-0.804851	-0.797004	-0.339306	-0.537095	-1.01036	-0.671316	-0.534034	-0.618884	-0.380695	-0.691949	-0.453327	-0.775606	-0.337718	0.376851	1.17011	-0.671316	-0.534034	-1.49831	-1.0499	-0.783665	-0.843814	-0.888177	-0.343745	4.06869	0.725708	-0.671316	-0.534034	-1.21924	-0.885016	-0.781067	-0.692401	-0.677146	-0.343507	2.19541	-0.164493
27	GB	-0.453158	-0.879034	-0.625838	1.34917	1.86632	-0.271598	-0.537095	-1.22062	0.0562597	-0.534034	-0.309433	0.858937	2.3448	1.04582	0.988673	-0.30543	-0.537095	-1.20221	0.0562597	-0.534034	-0.318618	1.27752	1.77319	0.0825176	-0.15972	-0.287344	-0.262739	-0.0388317	0.0562597	-0.534034	-0.916778	0.915353	-0.637747	0.811427	1.03179	-0.326878	2.94855	0.519309	0.0562597	-0.534034	-0.358161	0.204544	-0.719614	-0.95423	-0.875568	-0.340403	1.6708	-0.0579224
28	GB	-1.0582	-1.28019	-0.75662	-0.971191	-0.893893	-0.324336	-0.537095	-1.22067	-0.740237	-0.534034	-0.206291	-0.535577	0.351647	-0.980371	-0.907117	-0.253981	-0.537095	-1.21333	-0.740237	-0.534034	-0.50303	-0.687138	-0.514434	-0.93652	-0.9178	0.615687	-0.423294	1.51003	-0.740237	-0.534034	-1.0537	-1.03926	-0.77991	-0.862187	-0.847159	-0.171757	0.256424	0.927012	-0.740237	-0.534034	-0.797266	-1.13923	-0.808272	-0.973731	-0.934253	-0.312272	0.0449781	0.318833
29	GB	-0.833264	-1.03985	-0.631114	0.853855	1.26735	-0.262716	-0.537095	-1.22068	-1.1696	-0.534034	-0.0379282	0.686801	1.38037	0.28442	0.169448	-0.290616	-0.537095	-1.2161	-1.1696	-0.534034	-0.301178	0.644513	-0.0160678	0.450078	0.290346	0.177745	-0.497619	0.329245	-1.1696	-0.534034	-0.425339	0.293858	-0.725914	0.185863	0.428137	-0.126484	0.331176	0.334527	-1.1696	-0.534034	-0.00434619	-0.00826038	-0.759791	-0.987088	-0.90148	-0.305733	0.0483732	-0.0320987
30	GB	0.882884	-0.784901	-0.669475	1.02431	1.22879	-0.188803	-0.537095	-1.2207	0.606256	-0.520435	2.35996	0.84118	0.922903	1.27979	0.662935	-0.210024	-0.537095	-1.21174	0.606256	-0.520435	0.886945	2.1691	-0.290889	2.146	0.0157667	-0.273098	-0.50083	0.142314	0.606256	-0.520435	0.691787	2.17577	-0.771678	1.40222	1.67931	-0.28117	0.675726	1.7765	0.606256	-0.520435	1.47232	1.20452	-0.801789	0.730416	0.916683	-0.336011	0.792801	1.08948
31	GB	0.511397	-0.879325	-0.686219	0.886324	0.788719	-0.223714	-0.537095	-1.2207	1.80257	0.600377	2.58017	0.0780505	0.156954	0.934479	1.06081	-0.10171	-0.537095	-1.21186	1.80257	0.600377	1.06938	1.72903	-0.704642	1.1598	0.118669	-0.00721408	-0.516816	0.465784	1.80257	0.600377	0.995796	2.02735	-0.726046	0.894089	1.1428	-0.235518	0.0557538	2.10006	1.80257	0.600377	1.71345	1.14558	-0.767126	2.0826	2.68618	-0.329539	0.0148261	1.24584
32	GB	-0.971769	-1.16604	-0.572409	-0.777292	-0.67343	-0.260855	-0.537095	-1.2207	0.116065	2.05619	-0.000519253	-0.243008	0.534797	-0.667171	-0.597539	0.0655313	-0.537095	-1.21726	0.116065	2.05619	-0.252492	0.763082	-0.174589	-0.562647	-0.417778	3.88714	-0.511862	0.429488	0.116065	2.05619	-0.483479	-0.28926	-0.488561	-0.122554	0.0573269	4.71321	-0.0979898	1.13149	0.116065	2.05619	0.243702	-0.256325	-0.564888	-0.853755	-0.737239	0.529754	-0.26518	0.5114
33	GOM	-0.377128	-0.553034	-0.974104	-0.142422	-0.151966	0.124998	-0.319249	-0.814334	2.91348	1.41019	0.158611	0.0847401	0.389458	0.337132	0.333257	1.58568	-0.319249	-0.811208	2.91348	1.41019	-0.0890433	0.690941	-0.598497	0.235147	0.0925792	2.62671	0.460446	-0.0951257	2.91348	1.41019	-0.249949	0.0623777	-0.839292	2.36218	2.00596	-0.2837	6.47217	0.669136	2.91348	1.41019	-0.107366	0.338757	-0.922068	0.0657075	0.0783268	-0.502484	3.47786	0.122213
34	GOM	-0.709069	-0.735207	-0.740912	-0.215639	-0.190988	-0.163013	-0.319249	-0.814327	0.212459	-0.0599942	-0.235414	-0.199424	-0.166933	-0.214677	-0.19124	0.343904	-0.319249	-0.810959	0.212459	-0.0599942	-0.419884	0.287183	0.399123	-0.216374	-0.192357	3.44194	0.00821629	0.109907	0.212459	-0.0599942	-0.587027	-0.183292	-0.380379	-0.16001	-0.157267	0.213509	2.16396	1.5732	0.212459	-0.0599942	-0.422887	-0.41582	-0.461751	-0.183834	-0.160164	-0.284388	1.23033	0.815393
35	GOM	0.577628	0.335432	-0.997762	0.310324	0.126949	-0.130257	-0.319249	-0.81434	1.02518	0.581381	1.92846	2.08943	3.01936	0.0576229	-0.0768491	0.576937	-0.319249	-0.798677	1.02518	0.581381	2.71464	5.82664	2.072	0.282667	-0.090819	-0.5465	0.35256	1.77408	1.02518	0.581381	1.65517	3.02621	-0.6482	-0.0921609	-0.0709189	-0.589486	2.59558	5.29251	1.02518	0.581381	3.25634	1.71482	-0.988495	-0.0560512	-0.12486	-0.586582	1.54635	3.47999
36	GOM	-0.406366	-0.514209	-0.867683	-0.0295483	-0.0911603	0.587517	-0.319249	-0.814337	0.744836	0.986422	0.479892	0.92169	2.02212	-0.061972	-0.0451136	0.211522	-0.319249	-0.812294	0.744836	0.986422	0.191083	1.94138	1.03184	-0.0578039	-0.109334	-0.451788	-0.134883	0.176219	0.744836	0.986422	-0.165214	0.518458	-0.288561	-0.0680519	-0.0905622	-0.560461	0.838134	1.28294	0.744836	0.986422	0.379527	0.474803	-0.642792	-0.0404928	-0.0450237	-0.35961	0.367615	0.678256
37	GOM	-0.726675	-0.74272	-0.543451	-0.21207	-0.186612	-0.252739	-0.319249	-0.814337	0.768898	-0.707711	-0.227955	-0.349208	-0.203333	-0.216949	-0.193095	-0.239513	-0.319249	-0.813316	0.768898	-0.707711	-0.516028	0.00814818	0.679802	-0.211669	-0.186665	0.70274	-0.219616	-0.282341	0.768898	-0.707711	-0.566645	-0.235888	0.054355	-0.21521	-0.190055	-0.26722	0.428342	0.39808	0.768898	-0.707711	-0.444618	-0.327722	0.0157259	-0.199878	-0.175182	-0.337336	0.19509	0.0344781
39	GOM	-0.707049	-0.856494	-0.861993	-0.218636	-0.193242	-0.583304	-0.319249	-0.81434	-0.679654	-0.675122	-0.342533	-0.548778	-0.0234987	-0.219091	-0.193934	-0.39119	-0.319249	-0.814052	-0.679654	-0.675122	-0.558061	-0.485499	-0.07389	-0.219414	-0.194007	1.39042	-0.316229	-0.582674	-0.679654	-0.675122	-0.626528	-0.389043	-0.766513	-0.218388	-0.19341	0.0178462	-0.226528	-0.593384	-0.679654	-0.675122	-0.360413	-0.592174	-0.880772	-0.217863	-0.192791	-0.481423	-0.264652	-0.643282
40	GOM	0.248032	-0.626002	-0.924794	-0.0594358	-0.0501454	-0.515025	-0.319249	-0.81434	0.109972	2.6146	1.87698	1.15369	2.02329	-0.183345	-0.159636	-0.544379	-0.319249	-0.811845	0.109972	2.6146	3.96972	1.25861	1.58622	-0.157547	-0.145569	-0.590491	-0.319249	0.61821	0.109972	2.6146	2.587	3.54149	-0.451551	-0.183678	-0.165474	-0.585471	-0.319249	0.566791	0.109972	2.6146	4.23503	0.876138	-0.703131	-0.118636	-0.102003	-0.560656	-0.319249	0.324468
41	GOM	-0.588087	-0.773519	-0.747685	-0.20788	-0.18357	0.233039	-0.319249	-0.814336	-0.215532	0.240666	-0.296047	-0.153442	0.221762	-0.213531	-0.18845	-0.346364	-0.319249	-0.812893	-0.215532	0.240666	-0.194155	-0.0258955	1.26307	-0.215966	-0.190761	-0.176699	-0.319249	0.715597	-0.215532	0.240666	-0.353522	0.255543	-0.0363868	-0.216448	-0.191457	-0.388366	-0.319249	1.30922	-0.215532	0.240666	0.0564956	-0.159248	-0.21075	-0.209087	-0.184204	0.116832	-0.319249	0.821145
42	GOM	-0.688892	-0.805262	-0.691262	-0.214373	-0.189045	-0.200349	-0.319249	-0.814338	-0.394535	-0.732436	-0.333059	-0.486531	-0.410352	-0.218245	-0.193317	-0.525914	-0.319249	-0.813822	-0.394535	-0.732436	-0.416584	-0.346471	0.617917	-0.218417	-0.193145	-0.55618	-0.319249	0.135156	-0.394535	-0.732436	-0.528176	-0.147963	-0.148117	-0.200837	-0.175262	-0.558514	-0.319249	0.0590699	-0.394535	-0.732436	-0.175973	-0.410685	-0.321132	-0.216903	-0.191646	-0.469926	-0.319249	-0.125875
43	GOM	-0.618324	-0.842788	-0.890381	-0.188784	-0.164046	-0.588905	-0.319249	-0.814338	-0.842312	-0.74065	-0.399515	-0.0759059	0.00713871	-0.206767	-0.183855	-0.591337	-0.319249	-0.813916	-0.842312	-0.74065	-0.414531	-0.151606	0.25382	-0.211698	-0.190319	-0.589298	-0.319249	1.03707	-0.842312	-0.74065	-0.342997	0.127348	-0.624661	-0.153975	-0.136246	-0.437266	-0.319249	0.449841	-0.842312	-0.74065	-0.0896836	-0.378854	-0.758399	-0.199973	-0.181611	-0.556294	-0.319249	0.163776
44	GOM	-0.321253	-0.81795	-1.0034	-0.00252257	-0.0107961	NaN	NaN	-0.81434	-0.855873	-0.74065	-0.347713	0.0566984	0.362962	0.0276947	0.0486501	NaN	NaN	-0.814277	-0.855873	-0.74065	-0.424228	0.510175	0.0178821	0.519312	0.531322	NaN	NaN	-0.278502	-0.855873	-0.74065	-0.24402	0.200135	-0.656796	9.07865	9.21459	-0.555857	NaN	-0.371804	-0.855873	-0.74065	-0.194151	0.00113969	-0.968469	-0.15477	-0.133354	-0.58552	NaN	-0.468176
45	GOM	0.00293848	-0.864293	-0.875611	-0.0356967	-0.0257049	-0.551329	-0.319249	-0.81434	-0.347144	0.557811	0.0796066	-0.316413	-0.201993	-0.18886	-0.166458	-0.56485	-0.319249	-0.813866	-0.347144	0.557811	0.672532	0.0179287	-0.117385	-0.185271	-0.162659	-0.583997	-0.319249	-0.0352978	-0.347144	0.557811	0.665272	1.21772	-0.752434	-0.0925782	-0.069359	-0.589164	-0.319249	-0.263103	-0.347144	0.557811	1.03805	0.0412661	-0.842832	-0.197981	-0.174941	-0.560454	-0.319249	-0.348903
46	GOM	-0.436242	-0.851741	-0.846547	-0.14221	-0.116403	-0.591387	-0.319249	-0.814338	-0.751828	-0.723757	-0.323149	-0.485714	-0.183509	-0.213056	-0.192304	-0.590878	-0.319249	-0.813923	-0.751828	-0.723757	-0.226904	-0.272711	0.494412	0.185458	0.213107	-0.584415	-0.319249	1.41713	-0.751828	-0.723757	-0.0824798	0.0489635	-0.263892	-0.217006	-0.192523	1.7272	-0.319249	0.990558	-0.751828	-0.723757	-0.0177954	-0.285586	-0.568265	-0.0748279	-0.0479345	-0.161902	-0.319249	0.370623
47	GOM	-0.62254	-0.790202	-0.974878	-0.202415	-0.18579	NaN	NaN	-0.814339	-0.855873	-0.74065	-0.3939	-0.346783	-0.0854128	-0.21842	-0.193213	NaN	NaN	-0.814066	-0.855873	-0.74065	-0.639174	-0.0395002	0.368512	-0.18278	-0.188728	NaN	NaN	0.573532	-0.855873	-0.74065	-0.574871	0.0579895	-0.75845	-0.203016	-0.178102	3.81326	NaN	0.561029	-0.855873	-0.74065	-0.445368	-0.558173	-0.895792	-0.149531	-0.156392	0.616854	NaN	0.186509
381	GOM	-0.67824	-0.891068	-0.972934	-0.204023	-0.192339	NaN	NaN	-0.814338	-0.855873	-0.74065	-0.373179	-0.527543	-0.136869	-0.213964	-0.193815	-0.0671669	NaN	-0.813906	-0.855873	-0.74065	-0.582249	-0.498248	-0.763255	-0.214554	-0.191362	3.00853	NaN	-0.0746793	-0.855873	-0.74065	-0.690668	-0.700794	-0.916563	-0.216528	-0.191907	4.04793	NaN	-0.0900495	-0.855873	-0.74065	-0.510469	-0.744996	-0.951039	-0.21916	-0.194154	0.402682	NaN	-0.284186
382	GOM	-0.747631	-0.780008	-0.801045	-0.212133	-0.18668	-0.532651	-0.319249	-0.814337	0.0237939	-0.529455	-0.319435	-0.549536	-0.383752	-0.218264	-0.193049	-0.469566	-0.319249	-0.813338	0.0237939	-0.529455	-0.498255	-0.22879	0.232083	-0.218354	-0.192964	1.39726	-0.316576	-0.00651748	0.0237939	-0.529455	-0.636031	-0.301364	-0.525366	-0.213704	-0.188319	0.168448	-0.262253	0.281433	0.0237939	-0.529455	-0.364673	-0.52631	-0.414928	-0.214139	-0.188921	-0.408712	-0.283544	0.0332734
[truncated: 12 more columns]

## Sheet: EAI
Strata	Region	January/February	March/April	May/June	July/August	September/October	November/December
1	MAB	-0.336215	-0.312397	-0.42313	-0.512829	-0.600999	-0.463736
2	MAB	0.235942	0.0280122	-0.25964	-0.381616	-0.427516	-0.0756867
3	MAB	-0.077242	-0.0851659	0.0556071	-0.0236203	-0.0339216	-0.0881133
4	MAB	-0.615077	-0.298977	-0.176633	-0.404694	-0.558433	-0.565844
5	MAB	0.0279481	-0.00791096	-0.17213	-0.284271	-0.434121	-0.246641
6	MAB	-0.084647	-0.0217747	0.264513	0.201346	0.137008	-0.10091
7	MAB	-0.255515	0.103081	0.197232	-0.022729	-0.213227	-0.218819
8	MAB	0.313119	0.268459	0.0856086	0.0263731	-0.131818	0.0131609
9	MAB	-0.135915	0.195848	0.242753	0.00333593	-0.074194	-0.244617
10	MAB	-0.187732	0.276928	0.372584	0.0176949	-0.143031	-0.159855
11	MAB	0.239517	0.232888	0.0721249	-0.0665322	-0.227289	-0.0658684
12	MAB	0.544464	0.838878	0.863998	0.593177	0.495523	0.387345
13	MAB	0.0824936	0.212884	0.296673	0.0690304	-0.0221535	-0.019526
14	SNE	-0.537071	-0.299148	-0.31716	-0.44519	-0.504597	-0.501241
15	SNE	-0.196597	0.0657486	0.144855	0.050364	-0.120867	-0.155388
16	SNE	0.329622	0.403116	0.676946	0.895592	0.669568	0.318597
17	SNE	-0.451433	-0.325172	0.0996776	0.377185	0.292433	-0.261356
18	SNE	-0.694089	-0.52225	-0.563028	-0.644898	-0.681036	-0.665416
19	SNE	-0.471692	-0.137525	-0.0655336	-0.305862	-0.421473	-0.47828
20	SNE	-0.00415873	0.656308	0.616552	0.309608	0.22592	-0.0112411
21	SNE	0.323977	1.17473	0.610278	0.685085	0.622055	0.391905
22	SNE	-0.336225	-0.176154	-0.242882	-0.316947	-0.344432	-0.319414
23	SNE	-0.491021	-0.192482	-0.130985	-0.407602	-0.467203	-0.473157
24	SNE	-0.412525	0.126044	-0.131156	-0.331384	-0.402182	-0.434281
25	SNE	0.346788	0.890526	0.318565	0.484384	0.293642	0.41778
26	GB	-0.65748	-0.397156	-0.235085	0.167541	-0.167549	-0.460164
27	GB	-0.440094	-0.0357072	0.0585164	0.259037	-0.0247743	-0.303703
28	GB	-0.679412	-0.474246	-0.130456	-0.312263	-0.429755	-0.52278
29	GB	-0.680174	-0.365778	-0.284257	-0.327526	-0.457042	-0.577519
30	GB	-0.282446	0.0175011	0.00142615	0.275677	0.191055	-0.026763
31	GB	0.0950377	0.338052	0.428551	0.641986	0.540279	0.361241
32	GB	-0.0206525	0.247263	1.11508	1.32676	0.430412	0.176888
33	GOM	0.503655	1.0011	1.28468	1.61388	1.06779	0.569331
34	GOM	-0.278581	-0.0729732	0.75092	0.456886	0.138224	-0.104027
35	GOM	0.0519879	0.775888	0.978191	1.17463	0.815444	0.512523
36	GOM	0.156629	0.508965	0.417909	0.423913	0.314556	0.251179
37	GOM	-0.294368	-0.217519	0.140053	0.0264177	-0.0601588	-0.126762
39	GOM	-0.644743	-0.483592	-0.122455	-0.45909	-0.578124	-0.625862
40	GOM	0.13822	0.605876	0.776632	0.570377	0.483309	0.349289
41	GOM	-0.218408	-0.183907	0.133382	0.00577641	0.0352796	0.143039
42	GOM	-0.508077	-0.513009	-0.301648	-0.395051	-0.413121	-0.390203
43	GOM	-0.684654	-0.542879	-0.330586	-0.447561	-0.525722	-0.566644
44	GOM	-0.524447	-0.332306	-0.296598	-0.374021	-0.565368	-0.483468
45	GOM	-0.330771	-0.233047	-0.112165	-0.162172	-0.208374	-0.267136
46	GOM	-0.653909	-0.559257	-0.236251	0.0980527	-0.378485	-0.503509
47	GOM	-0.534523	-0.405303	-0.209899	0.411647	-0.286881	-0.426956
381	GOM	-0.540454	-0.430609	0.167111	0.339348	-0.393357	-0.480917
382	GOM	-0.478294	-0.391821	0.132806	-0.167259	-0.293779	-0.34221
